# Supplementary material
Source: PubMed Central journal article supplement (PMC3128389)
Supplement: NIHMS301854-supplement-Supp_Data.pdf [file NIHMS301854-supplement-Supp_Data.pdf]

# European Journal of Immunology

**Supporting Information**

**for**

**DOI 10.1002/eji.201041233**

**Inhibition of T-cell activation by syndecan-4 is mediated by CD148 through protein tyrosine phosphatase activity**

Jin-Sung Chung, Ponciano D. Cruz Jr. and Kiyoshi Ariizumi

## Supplemental Figure 1

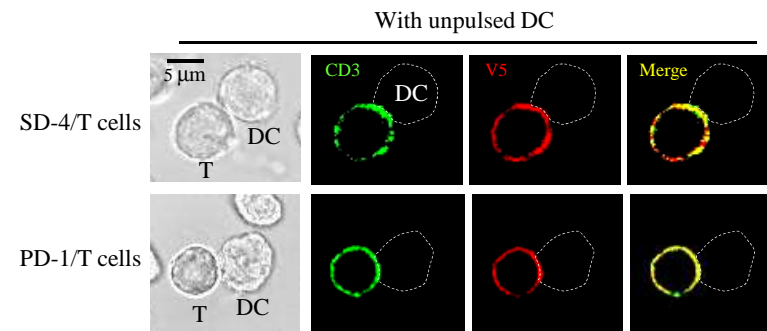

**Supplemental Figure 1. Exclusion of SD-4 from the IS is not induced by unpulsed DC.** V5-SD-4- or V5-PD-1-DO11.10 T cells ( $1 \times 10^6$ ) were co-cultured with unpulsed BM-DC ( $1 \times 10^6$  cells) for 30 min, and then stained fluorescently with anti-V5 (red) and anti-CD3 Ab (green). Images of T cell/DC conjugates were taken and analyzed by phase contrast or confocal microscopy. The location of DC is illustrated by white dashed lines.
